# Supplementary material for: Star-shaped Pd@Pt core–shell catalysts supported on reduced graphene oxide with superior electrocatalytic performance
Source: Royal Society of Chemistry journal article supplement (doi:10.1039/c4ta00070f), 2014-01-01
Supplement: c4ta00070f1.pdf [file c4ta00070f1.pdf]

## Electronic Supplementary Information (ESI)

### **Star-shaped Pd@Pt core–shell catalysts supported on reduced graphene oxide with superior electrocatalytic performance**

Youngmin Kim<sup>ab</sup>, Yuseong Noh<sup>ab</sup>, Eun Ja Lim<sup>ab</sup>, Seonhwa Lee<sup>bc</sup>, Sung Mook Choi<sup>d</sup>  
and Won Bae Kim<sup>\*abc</sup>

*<sup>a</sup>School of Materials Science and Engineering, Gwangju Institute of Science and Technology (GIST), Gwangju 500-712, Republic of Korea*

*<sup>b</sup>Research Institute for Solar and Sustainable Energies (RISE), Gwangju Institute of Science and Technology (GIST), Gwangju 500-712, Republic of Korea*

*<sup>c</sup>Department of Physics and Photon Science, Gwangju Institute of Science and Technology (GIST), Gwangju 500-712, Republic of Korea*

*<sup>d</sup>Surface Technology Division, Korea Institute of Materials Science (KIMS), Changwon 641-010, Republic of Korea*

**Table S1.** EXAFS fitting results of Pt L<sub>3</sub> edge and Pd K edge for the first shell of Pt/RGO, PdPt/RGO, and Pd@Pt/RGO.

| Catalyst  | Edge              | Shell | N <sup>a</sup> | R (Å) <sup>b</sup> | ΔE <sub>0</sub> (eV) <sup>c</sup> | σ <sup>2</sup> (Å <sup>2</sup> ) <sup>d</sup> | R-factor |
|-----------|-------------------|-------|----------------|--------------------|-----------------------------------|-----------------------------------------------|----------|
| Pt foil   | Pt L <sub>3</sub> | Pt-Pt | 12             | 2.767±0.002        | 8.1±0.4                           | 0.0048±0.0001                                 | 0.0006   |
| Pd foil   | Pd K              | Pd-Pd | 12             | 2.742±0.002        | -2.0±0.6                          | 0.0056±0.0003                                 | 0.0018   |
| Pt/RGO    | Pt L <sub>3</sub> | Pt-Pt | 8.2±0.7        | 2.759±0.004        | 8.2±1.0                           | 0.0065±0.0004                                 | 0.0045   |
| PdPt/RGO  | Pt L <sub>3</sub> | Pt-Pt | 5.4±0.6        | 2.735±0.005        | 7.2±0.6                           | 0.0067±0.0007                                 | 0.0073   |
|           |                   | Pt-Pd | 3.9±0.5        | 2.737±0.005        |                                   | 0.0062±0.0007                                 |          |
|           | Pd K              | Pd-Pd | 5.5±1.3        | 2.748±0.007        | -2.5±1.7                          | 0.0082±0.0013                                 | 0.0073   |
|           |                   | Pd-Pt | 2.0±0.2        | 2.737±0.005        |                                   | 0.0062±0.0007                                 |          |
| Pd@Pt/RGO | Pt L <sub>3</sub> | Pt-Pt | 6.6±0.8        | 2.743±0.008        | 6.6±1.2                           | 0.0062±0.0007                                 | 0.0034   |
|           |                   | Pt-Pd | 1.0±0.5        | 2.731±0.016        |                                   | 0.0039±0.0027                                 |          |
|           | Pd K              | Pd-Pd | 9.0±0.8        | 2.768±0.003        | -2.2±0.8                          | 0.0072±0.0004                                 | 0.0034   |
|           |                   | Pd-Pt | 0.5±0.3        | 2.731±0.016        |                                   | 0.0039±0.0027                                 |          |

<sup>a</sup> The average coordination number for the coordination shell.

<sup>b</sup> Interatomic distance.

<sup>c</sup> E<sub>0</sub> shift of the path.

<sup>d</sup> Debye-Waller factor.

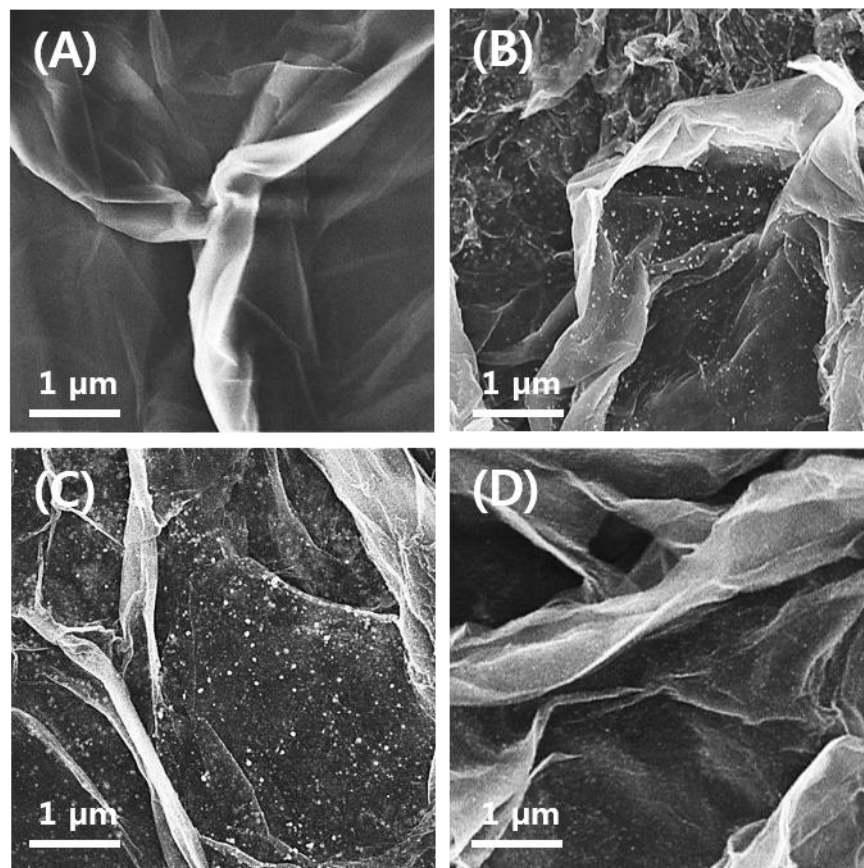

**Fig. S1.** SEM images of (A) GO, (B) Pd@Pt/RGO, (C) PdPt/RGO, and (D) Pt/RGO.

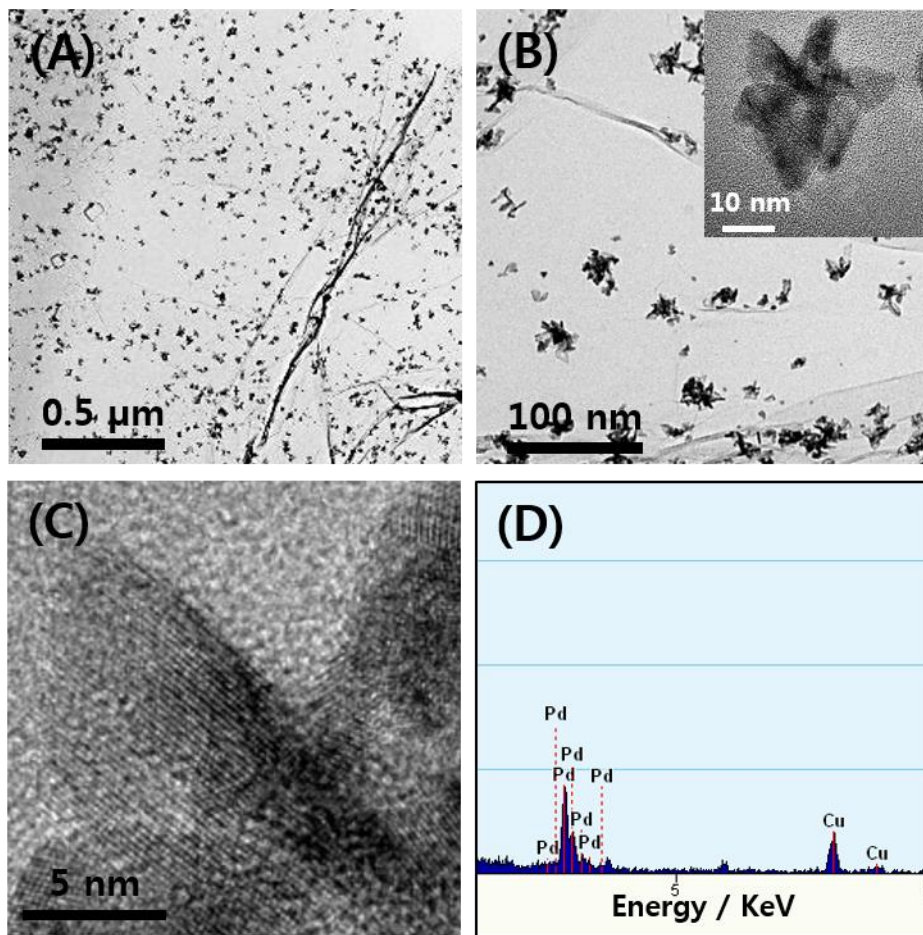

**Fig. S2.** (A-B) TEM images of Pd/RGO at different magnifications, (C) an HR-TEM image of Pd/RGO, and (D) the EDX spectrum of Pd/RGO. The inset in (B) shows an individual Pd particle on RGO.

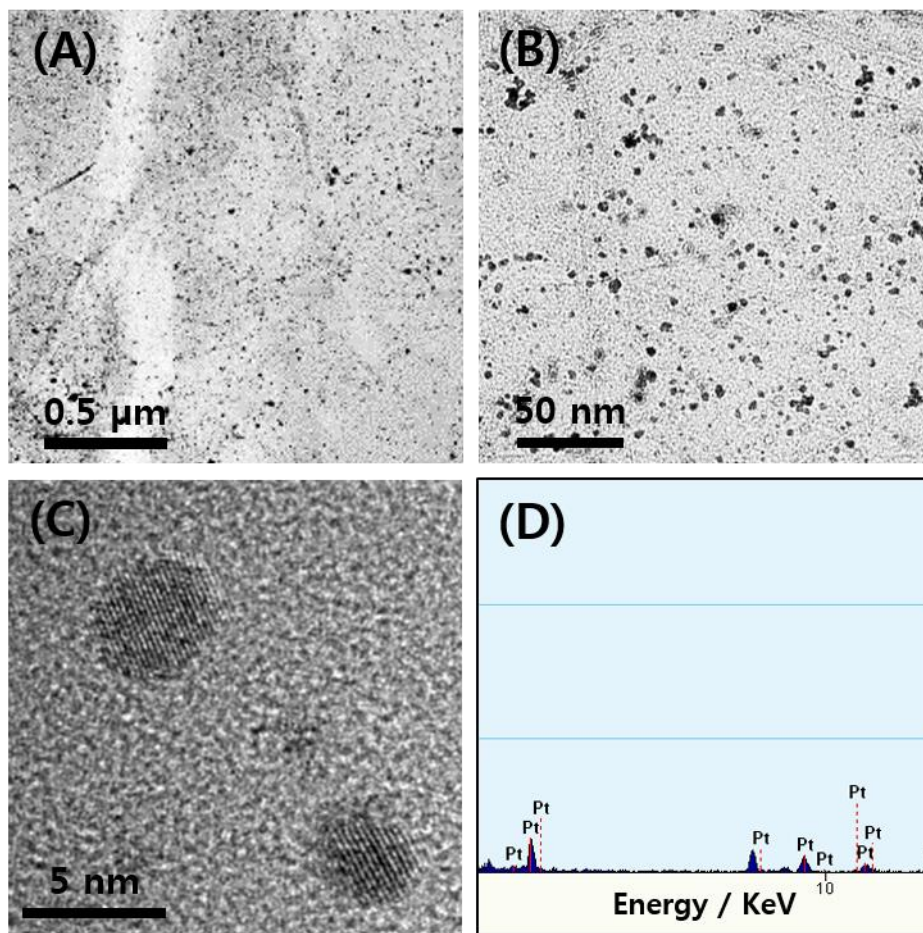

**Fig. S3.** (A-B) TEM images of Pt/RGO at different magnifications, (C) an HR-TEM image of Pt/RGO, and (D) the EDX spectrum of Pt/RGO.

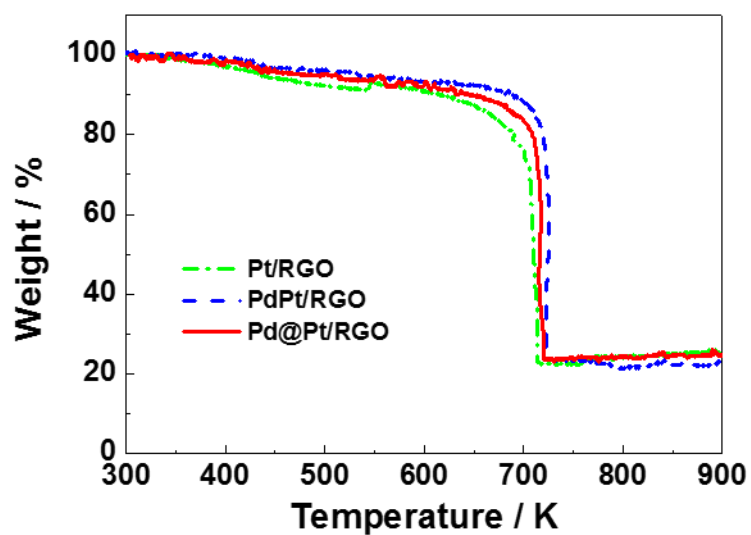

**Fig. S4.** TGA profiles of Pt/RGO, PdPt/RGO, and Pd@Pt/RGO catalysts from 300 K to 900 K at a temperature ramping rate of 10 K min<sup>-1</sup>.

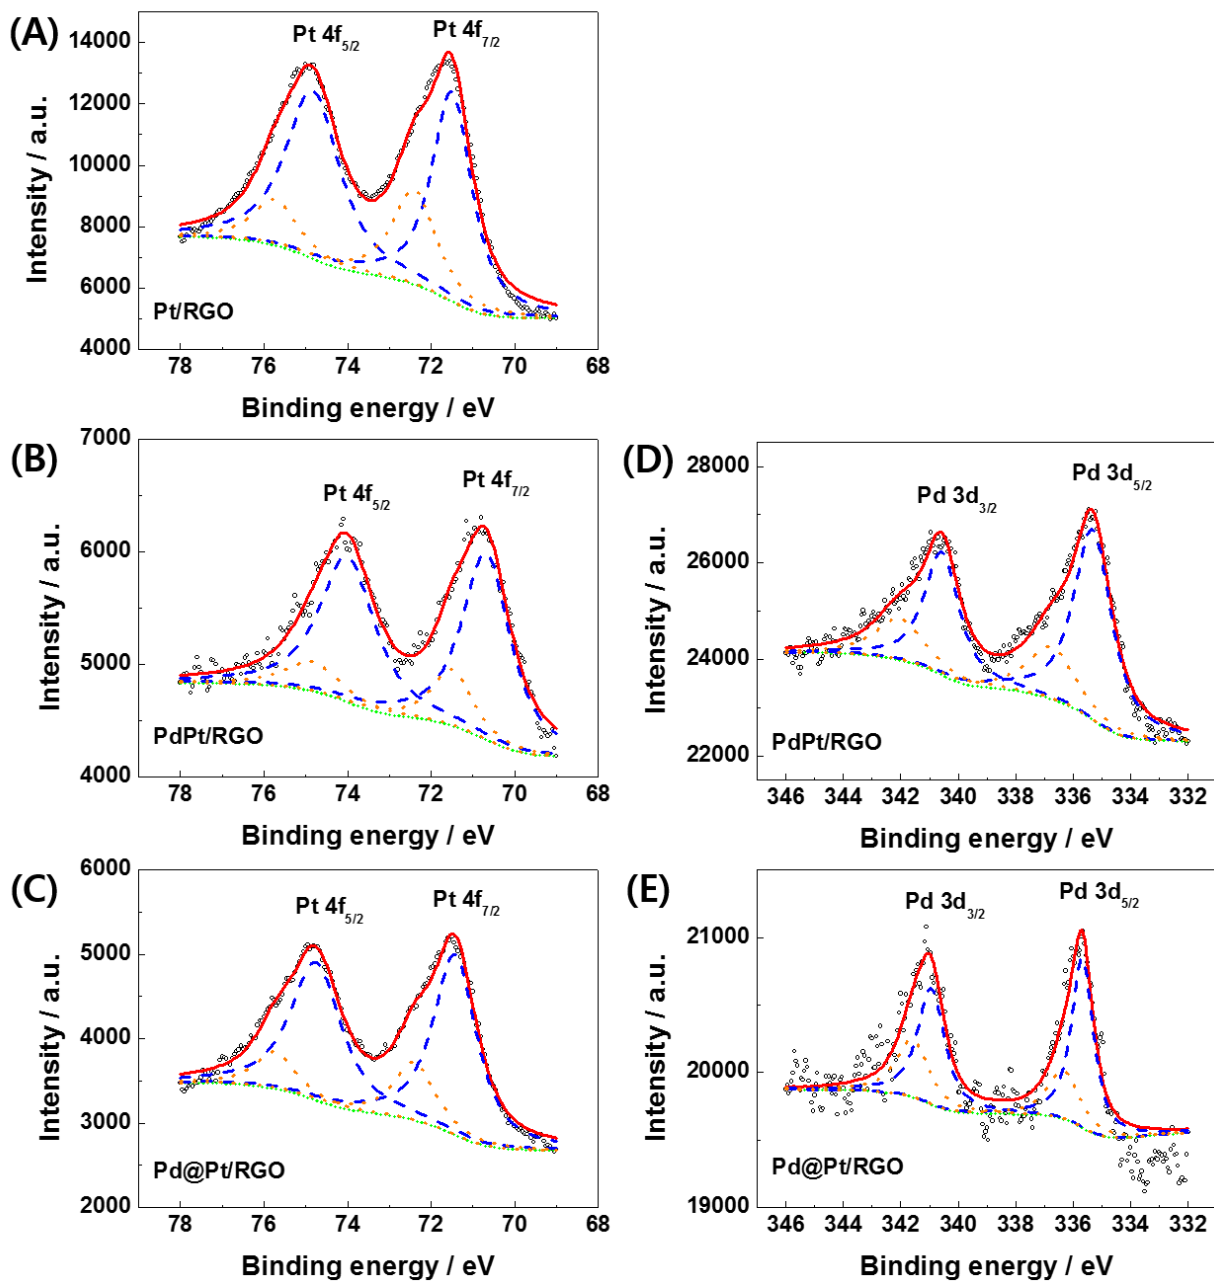

**Fig. S5.** Curve-fitted XPS spectra of (A-C) Pt 4f and (D, E) Pd 3d for Pt/RGO, PdPt/RGO, and Pd@Pt/RGO.

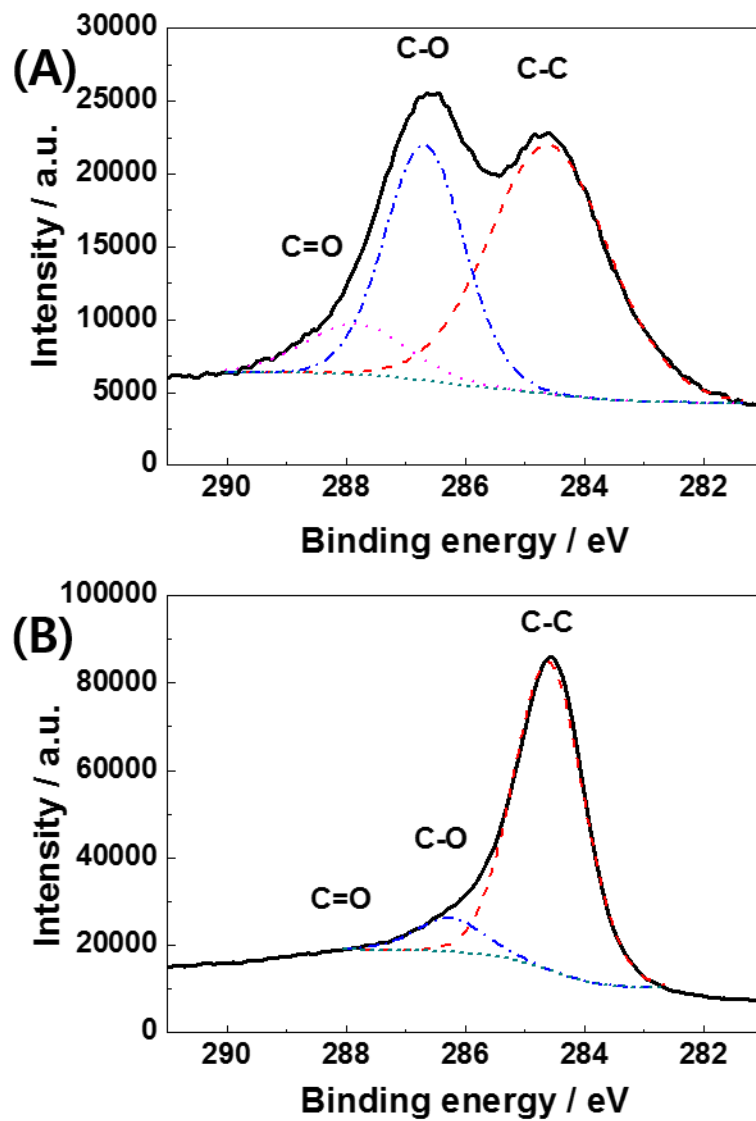

Fig. S6. Deconvoluted C1s XPS spectra for (A) GO and (B) Pd@Pt/RGO.



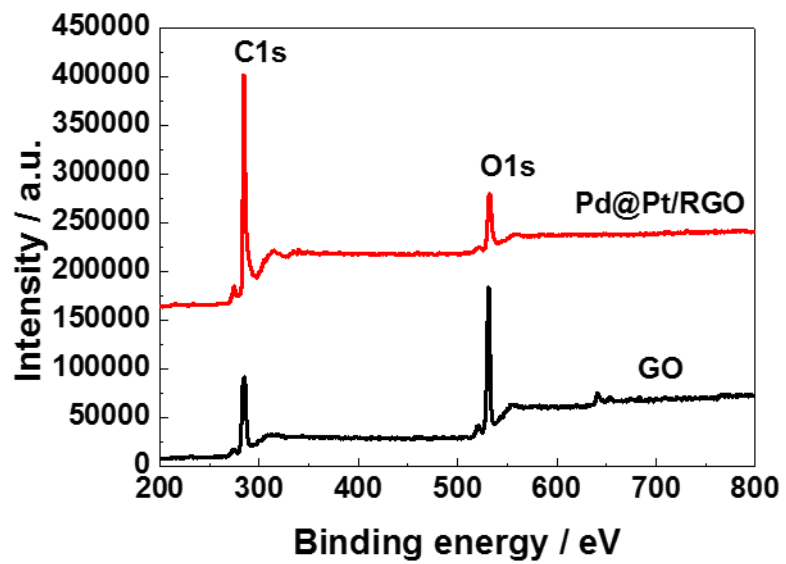

Fig. S7. XPS survey spectra of GO and Pd@Pt/RGO.

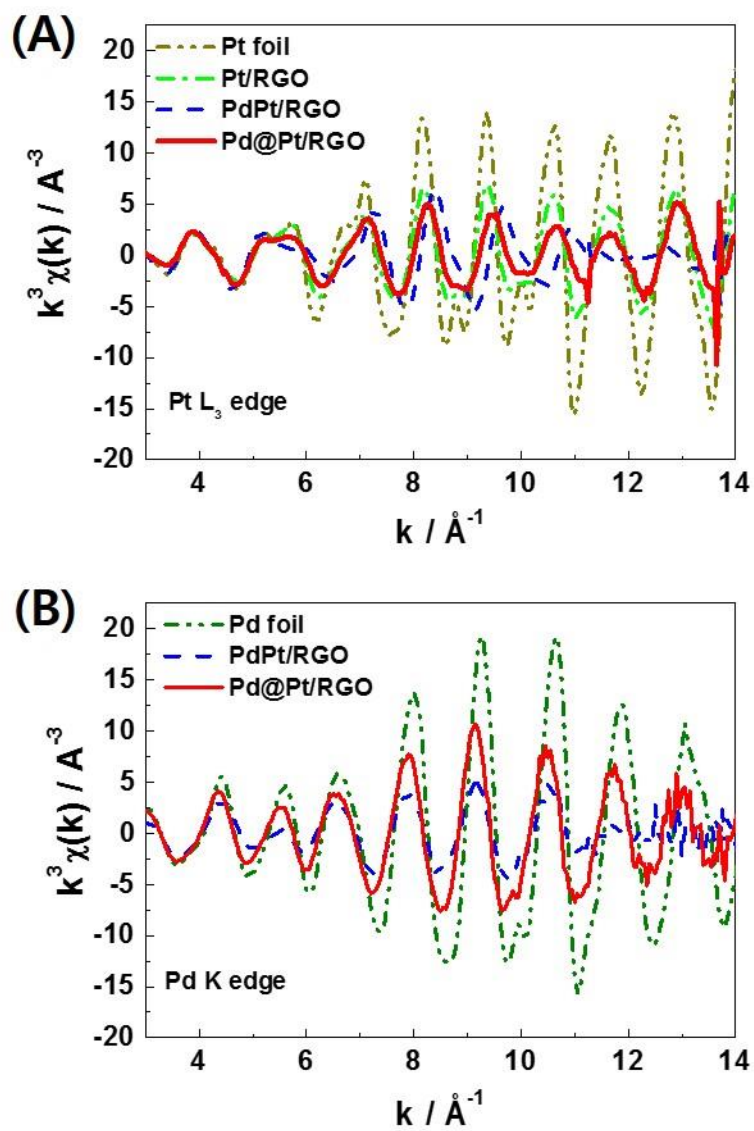

**Fig. S8.**  $k^3$ -weighted EXAFS spectra of (A) Pt  $L_3$ -edge and (B) Pd K-edge for Pt/RGO, Pd/RGO, PdPt/RGO, and Pd@Pt/RGO with their corresponding metal foils.

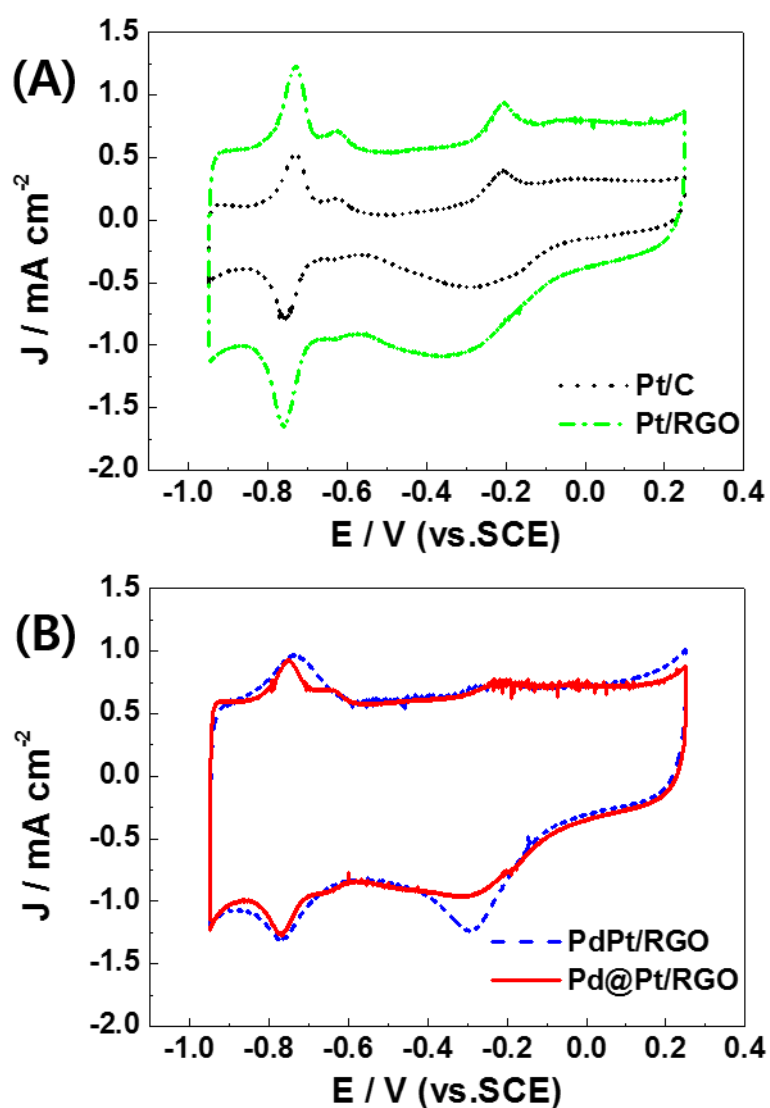

**Fig. S9.** CVs of the (A) monometallic Pt/C and Pt/RGO and (B) bimetallic PdPt/RGO and Pd@Pt/RGO in  $\text{N}_2$ -saturated 0.5 M NaOH solution; the scan rate was  $50 \text{ mV s}^{-1}$ .

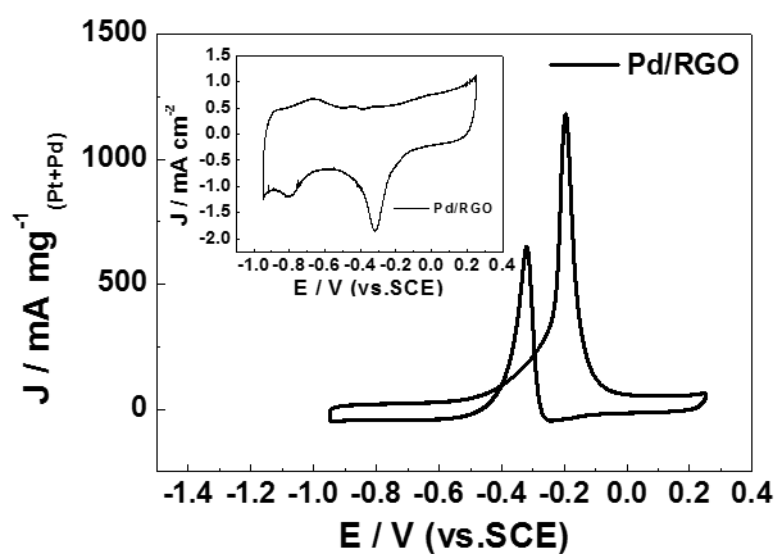

**Fig. S10.** CV of Pd/RGO in  $N_2$ -saturated 0.5 M NaOH + 0.5 M methanol obtained at a scan rate of 50  $mV s^{-1}$ . Inset shows the CV of Pd/RGO in  $N_2$ -saturated 0.5 M NaOH.

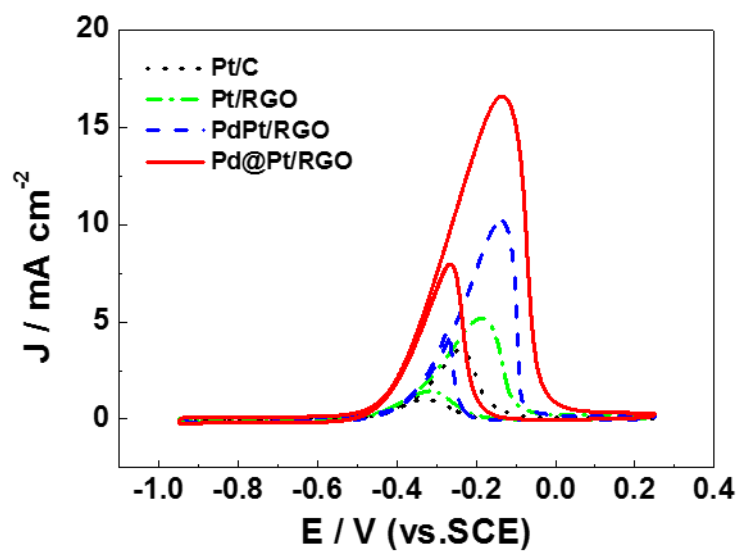

**Fig. S11.** ECSA-normalized CV curves of Pt/C, Pt/RGO, PdPt/RGO, and Pd@Pt/RGO in N<sub>2</sub>-saturated 0.5 M NaOH + 0.5 M methanol obtained at a scan rate of 50 mV s<sup>-1</sup>.

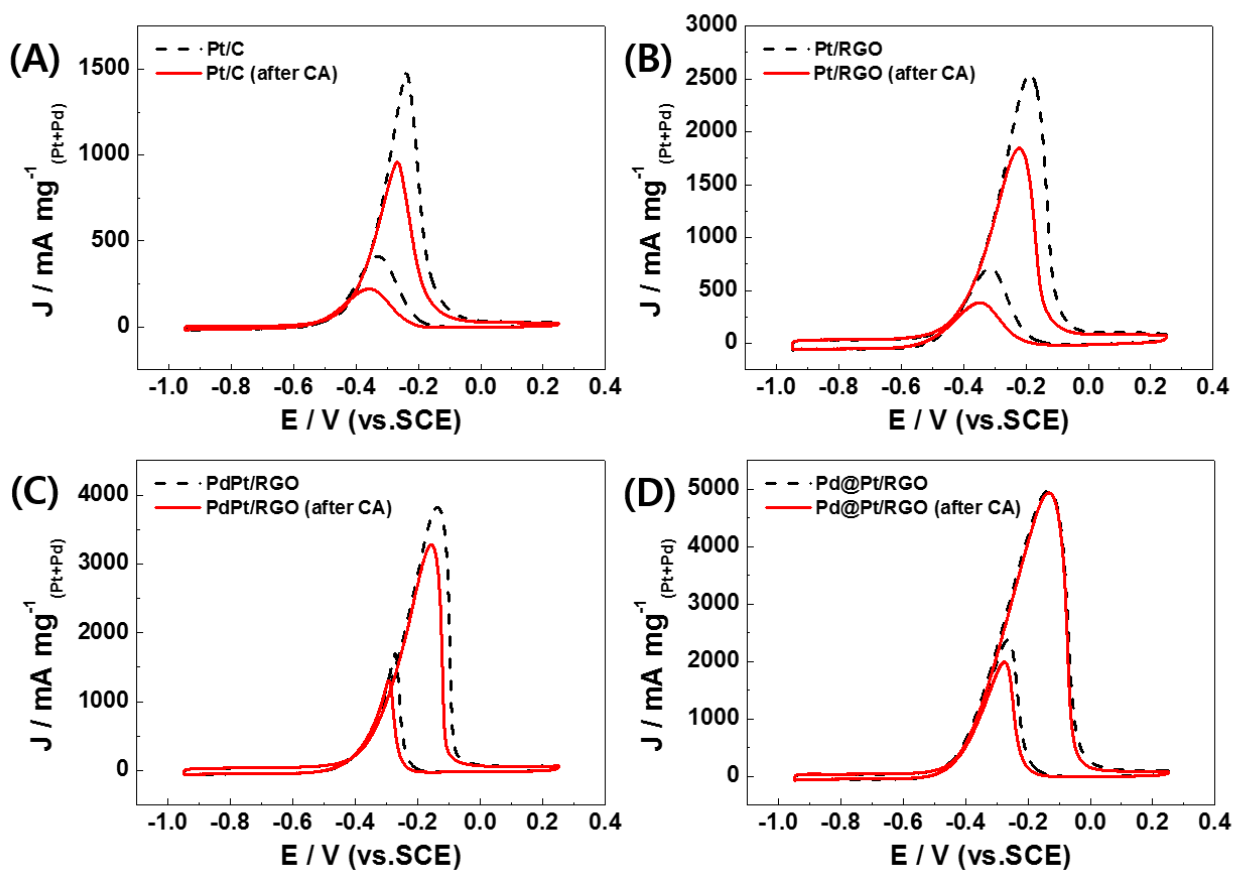

**Fig. S12.** CVs of (A) Pt/C, (B) Pt/RGO, (C) PdPt/RGO, and (D) Pd@Pt/RGO before and after CA tests in 0.5 M NaOH + 0.5 M methanol.

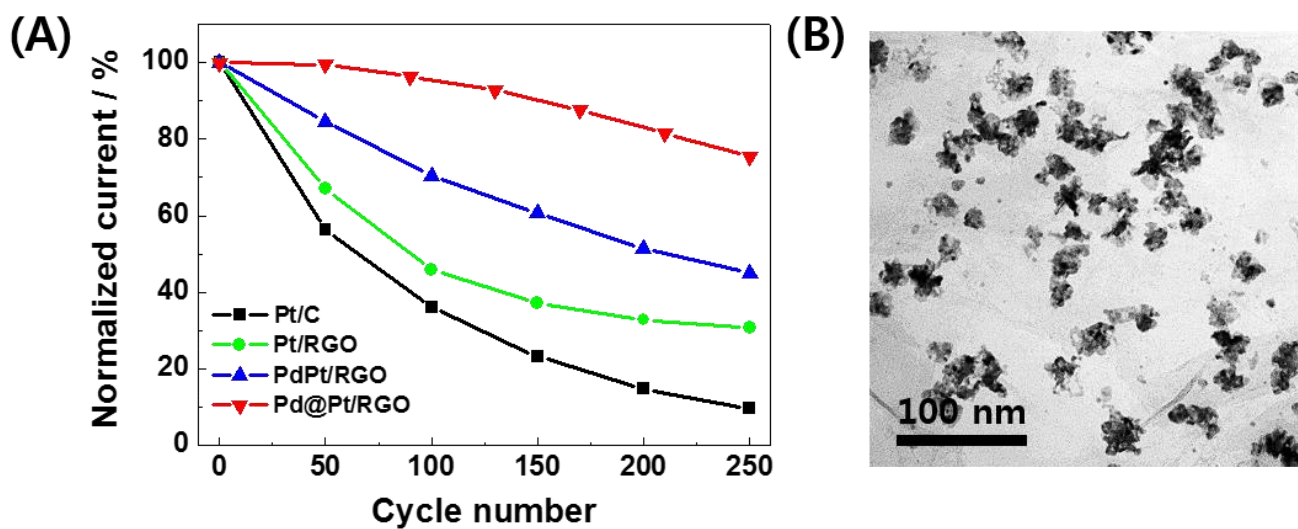

**Fig. S13.** (A) Normalized cycling stabilities of Pt/C, Pt/RGO, PdPt/RGO, and Pd@Pt/RGO in 0.5 M NaOH + 0.5 M methanol at a scan rate of  $50 \text{ mV s}^{-1}$ . (B) TEM image of the Pd@Pt/RGO after cycling stability test.
